# Supplementary material
Source: PubMed Central journal article supplement (PMC4319869)
Supplement: hesr0050-0020-sd3.pdf [file hesr0050-0020-sd3.pdf]

## APPENDIX

Bivariate results for all county factors evaluated in study. R<sup>2</sup> is percent of county level variance explained. N = 4,079 hospitals.

| Characteristic                    | Hospitals<br>N(%) | Readmission<br>mean(sd) | R-squared<br>County | P-value |
|-----------------------------------|-------------------|-------------------------|---------------------|---------|
| <b>N</b>                          | 4073 (100.0)      | 20.8 ( 1.8)             |                     |         |
| <b>Demographics/SES</b>           |                   |                         |                     |         |
| <b>C:Household Income</b>         |                   |                         | 2.9%                | <0.001  |
| Q: 1                              | 525 (12.9)        | 21.2 ( 2.0)             |                     |         |
| Q: 2                              | 592 (14.5)        | 20.8 ( 1.8)             |                     |         |
| Q: 3                              | 638 (15.7)        | 20.4 ( 1.6)             |                     |         |
| Q: 4                              | 883 (21.7)        | 20.7 ( 1.8)             |                     |         |
| Q: 5                              | 1435 (35.2)       | 21.2 ( 1.7)             |                     |         |
| <b>ARF:% Never married</b>        |                   |                         | 3.6%                | <0.001  |
| Q: 1                              | 510 (12.5)        | 20.4 ( 1.8)             |                     |         |
| Q: 2                              | 563 (13.8)        | 20.2 ( 1.5)             |                     |         |
| Q: 3                              | 684 (16.8)        | 20.6 ( 1.7)             |                     |         |
| Q: 4                              | 941 (23.1)        | 20.8 ( 1.5)             |                     |         |
| Q: 5                              | 1375 (33.8)       | 21.4 ( 1.9)             |                     |         |
| <b>ARF:% below poverty line</b>   |                   |                         | 3.8%                | <0.001  |
| Q: 1                              | 878 (21.6)        | 20.8 ( 1.7)             |                     |         |
| Q: 2                              | 787 (19.3)        | 20.6 ( 1.6)             |                     |         |
| Q: 3                              | 853 (20.9)        | 20.6 ( 1.6)             |                     |         |
| Q: 4                              | 910 (22.3)        | 21.1 ( 1.8)             |                     |         |
| Q: 5                              | 645 (15.8)        | 21.7 ( 2.0)             |                     |         |
| <b>ARF:Medicare benes/100k</b>    |                   |                         | 0.5%                | 0.014   |
| Q: 1                              | 1313 (32.2)       | 21.1 ( 1.8)             |                     |         |
| Q: 2                              | 935 (23.0)        | 21.0 ( 1.8)             |                     |         |
| Q: 3                              | 648 (15.9)        | 20.7 ( 1.7)             |                     |         |
| Q: 4                              | 626 (15.4)        | 20.7 ( 1.6)             |                     |         |
| Q: 5                              | 551 (13.5)        | 20.5 ( 1.8)             |                     |         |
| <b>ARF:Low Education</b>          |                   |                         | 2.6%                | <0.001  |
| No                                | 3472 (85.2)       | 21.1 ( 1.7)             |                     |         |
| Yes                               | 601 (14.8)        | 21.9 ( 2.0)             |                     |         |
| <b>ARF:Low Employment</b>         |                   |                         | 2.6%                | <0.001  |
| No                                | 3649 (89.6)       | 21.1 ( 1.7)             |                     |         |
| Yes                               | 424 (10.4)        | 22.2 ( 2.1)             |                     |         |
| <b>ARF:Retirement Destination</b> |                   |                         | 0.3%                | 0.008   |
| No                                | 3553 (87.2)       | 21.2 ( 1.8)             |                     |         |
| Yes                               | 520 (12.8)        | 20.7 ( 1.7)             |                     |         |

|                               |             |             |      |        |
|-------------------------------|-------------|-------------|------|--------|
| <b>ARF:Persistent Poverty</b> |             |             | 1.8% | <0.001 |
| No                            | 3771 (92.6) | 21.1 ( 1.8) |      |        |
| Yes                           | 302 ( 7.4)  | 21.8 ( 1.9) |      |        |
| <b>NCHS Urban-Rural Code</b>  |             |             | 6.9% | <0.001 |
| Large central metro           | 676 (16.6)  | 21.8 ( 1.9) |      |        |
| Large fringe metro            | 624 (15.3)  | 21.7 ( 1.6) |      |        |
| Medium metro                  | 639 (15.7)  | 20.6 ( 1.6) |      |        |
| Small metro                   | 423 (10.4)  | 20.5 ( 1.6) |      |        |
| Micropolitan                  | 785 (19.3)  | 20.8 ( 1.8) |      |        |
| Rural                         | 926 (22.7)  | 20.7 ( 1.8) |      |        |

---

**Access to Care**

---

|                               |             |             |      |        |
|-------------------------------|-------------|-------------|------|--------|
| <b>NHs/100k</b>               |             |             | 2.9% | <0.001 |
| Q: 1                          | 1351 (33.2) | 21.2 ( 1.8) |      |        |
| Q: 2                          | 862 (21.2)  | 20.9 ( 1.7) |      |        |
| Q: 3                          | 762 (18.7)  | 20.8 ( 1.7) |      |        |
| Q: 4                          | 560 (13.7)  | 20.5 ( 1.7) |      |        |
| Q: 5                          | 524 (12.9)  | 19.9 ( 1.6) |      |        |
| <b>ARF:GPs/100k</b>           |             |             | 6.9% | <0.001 |
| Q: 1                          | 725 (17.8)  | 21.6 ( 1.9) |      |        |
| Q: 2                          | 879 (21.6)  | 21.2 ( 1.8) |      |        |
| Q: 3                          | 958 (23.5)  | 21.0 ( 1.7) |      |        |
| Q: 4                          | 811 (19.9)  | 20.5 ( 1.6) |      |        |
| Q: 5                          | 700 (17.2)  | 20.1 ( 1.5) |      |        |
| <b>ARF:NonGPs/100k</b>        |             |             | 1.5% | <0.001 |
| Q: 1                          | 503 (12.3)  | 20.1 ( 1.6) |      |        |
| Q: 2                          | 514 (12.6)  | 20.5 ( 1.6) |      |        |
| Q: 3                          | 614 (15.1)  | 20.8 ( 1.7) |      |        |
| Q: 4                          | 812 (19.9)  | 20.7 ( 1.6) |      |        |
| Q: 5                          | 1630 (40.0) | 21.2 ( 1.8) |      |        |
| <b>ARF:Specialists/100k</b>   |             |             | 2.8% | <0.001 |
| Q: 1                          | 503 (12.3)  | 20.0 ( 1.5) |      |        |
| Q: 2                          | 525 (12.9)  | 20.4 ( 1.6) |      |        |
| Q: 3                          | 590 (14.5)  | 20.7 ( 1.8) |      |        |
| Q: 4                          | 814 (20.0)  | 20.7 ( 1.6) |      |        |
| Q: 5                          | 1641 (40.3) | 21.2 ( 1.8) |      |        |
| <b>ARF:Cardiologists/100k</b> |             |             | 2.5% | <0.001 |
| Q: 1                          | 1345 (33.0) | 20.3 ( 1.7) |      |        |
| Q: 2                          | 0 ( 0.0)    | . ( .)      |      |        |
| Q: 3                          | 286 ( 7.0)  | 20.6 ( 1.7) |      |        |
| Q: 4                          | 886 (21.8)  | 20.9 ( 1.7) |      |        |
| Q: 5                          | 1556 (38.2) | 21.2 ( 1.8) |      |        |

|                            |             |             |      |        |
|----------------------------|-------------|-------------|------|--------|
| <b>ARF: GPs/Specialist</b> |             |             | 7.7% | <0.001 |
| Q: 1                       | 1642 (40.3) | 21.4 ( 1.7) |      |        |
| Q: 2                       | 763 (18.7)  | 20.5 ( 1.7) |      |        |
| Q: 3                       | 625 (15.3)  | 20.3 ( 1.7) |      |        |
| Q: 4                       | 532 (13.1)  | 20.3 ( 1.6) |      |        |
| Q: 5                       | 511 (12.5)  | 20.0 ( 1.5) |      |        |
| <b>AHA: Beds/100k</b>      |             |             | 0.9% | <0.001 |
| Q: 1                       | 584 (14.3)  | 20.6 ( 1.7) |      |        |
| Q: 2                       | 813 (20.0)  | 20.7 ( 1.5) |      |        |
| Q: 3                       | 980 (24.1)  | 20.8 ( 1.8) |      |        |
| Q: 4                       | 952 (23.4)  | 21.2 ( 1.9) |      |        |
| Q: 5                       | 744 (18.3)  | 21.0 ( 1.8) |      |        |

---

**Nursing Home Quality**

---

|                                  |             |             |       |        |
|----------------------------------|-------------|-------------|-------|--------|
| <b>NH: Vaccine Score</b>         |             |             | 1.6%  | <0.001 |
| Q: 1                             | 1006 (24.7) | 21.4 ( 1.8) |       |        |
| Q: 2                             | 881 (21.6)  | 20.8 ( 1.7) |       |        |
| Q: 3                             | 751 (18.4)  | 20.8 ( 1.8) |       |        |
| Q: 4                             | 549 (13.5)  | 20.7 ( 1.7) |       |        |
| Q: 5                             | 459 (11.3)  | 20.4 ( 1.5) |       |        |
| <b>NH:Overall Rating</b>         |             |             | 1.3%  | <0.001 |
| Q: 1                             | 683 (16.8)  | 21.0 ( 1.7) |       |        |
| Q: 2                             | 1326 (32.6) | 21.0 ( 1.8) |       |        |
| Q: 3                             | 683 (16.8)  | 21.1 ( 1.8) |       |        |
| Q: 4                             | 747 (18.3)  | 20.7 ( 1.7) |       |        |
| Q: 5                             | 579 (14.2)  | 20.5 ( 1.8) |       |        |
| <b>% HR LS pressure sores</b>    |             |             | 11.7% | <0.001 |
| Q: 1                             | 570 (14.0)  | 19.8 ( 1.4) |       |        |
| Q: 2                             | 680 (16.7)  | 20.3 ( 1.5) |       |        |
| Q: 3                             | 849 (20.8)  | 20.6 ( 1.6) |       |        |
| Q: 4                             | 966 (23.7)  | 21.0 ( 1.6) |       |        |
| Q: 5                             | 937 (23.0)  | 21.9 ( 1.9) |       |        |
| <b>% LS flu vaccine</b>          |             |             | 0.9%  | 0.001  |
| Q: 1                             | 779 (19.1)  | 21.3 ( 1.7) |       |        |
| Q: 2                             | 713 (17.5)  | 21.1 ( 1.7) |       |        |
| Q: 3                             | 466 (11.4)  | 21.1 ( 1.8) |       |        |
| Q: 4                             | 385 ( 9.5)  | 20.7 ( 1.9) |       |        |
| Q: 5                             | 306 ( 7.5)  | 20.6 ( 1.6) |       |        |
| <b>% LS depressed or anxious</b> |             |             | 5.1%  | <0.001 |
| Q: 1                             | 937 (23.0)  | 21.3 ( 1.7) |       |        |
| Q: 2                             | 936 (23.0)  | 21.1 ( 1.8) |       |        |
| Q: 3                             | 851 (20.9)  | 21.0 ( 1.8) |       |        |
| Q: 4                             | 695 (17.1)  | 20.6 ( 1.6) |       |        |
| Q: 5                             | 594 (14.6)  | 20.0 ( 1.6) |       |        |

|                                         |             |             |       |        |
|-----------------------------------------|-------------|-------------|-------|--------|
| <b>% LS with UTI</b>                    |             |             | -0.1% | 0.049  |
| Q: 1                                    | 717 (17.6)  | 21.1 ( 2.1) |       |        |
| Q: 2                                    | 963 (23.6)  | 21.1 ( 1.8) |       |        |
| Q: 3                                    | 931 (22.9)  | 20.8 ( 1.7) |       |        |
| Q: 4                                    | 795 (19.5)  | 20.7 ( 1.5) |       |        |
| Q: 5                                    | 608 (14.9)  | 20.9 ( 1.7) |       |        |
| <b>% LS pne vaccine</b>                 |             |             | 1.1%  | <0.001 |
| Q: 1                                    | 764 (18.8)  | 21.3 ( 1.8) |       |        |
| Q: 2                                    | 738 (18.1)  | 21.1 ( 1.7) |       |        |
| Q: 3                                    | 582 (14.3)  | 20.9 ( 1.7) |       |        |
| Q: 4                                    | 414 (10.2)  | 20.7 ( 1.9) |       |        |
| Q: 5                                    | 310 ( 7.6)  | 20.6 ( 1.6) |       |        |
| <b>% LS physically restrained</b>       |             |             | 1.5%  | <0.001 |
| Q: 1                                    | 593 (14.6)  | 20.3 ( 1.6) |       |        |
| Q: 2                                    | 791 (19.4)  | 20.7 ( 1.8) |       |        |
| Q: 3                                    | 960 (23.6)  | 21.2 ( 1.9) |       |        |
| Q: 4                                    | 868 (21.3)  | 21.1 ( 1.7) |       |        |
| Q: 5                                    | 802 (19.7)  | 20.9 ( 1.6) |       |        |
| <b>% LS need for help has increased</b> |             |             | 1.1%  | <0.001 |
| Q: 1                                    | 926 (22.7)  | 20.9 ( 1.8) |       |        |
| Q: 2                                    | 969 (23.8)  | 21.4 ( 1.9) |       |        |
| Q: 3                                    | 745 (18.3)  | 20.6 ( 1.6) |       |        |
| Q: 4                                    | 780 (19.2)  | 20.5 ( 1.5) |       |        |
| Q: 5                                    | 592 (14.5)  | 21.0 ( 1.8) |       |        |
| <b>% LR LS pressure sores</b>           |             |             | 1.2%  | <0.001 |
| Q: 1                                    | 507 (12.4)  | 20.6 ( 1.7) |       |        |
| Q: 2                                    | 779 (19.1)  | 20.8 ( 1.6) |       |        |
| Q: 3                                    | 1156 (28.4) | 21.0 ( 1.7) |       |        |
| Q: 4                                    | 861 (21.1)  | 21.3 ( 1.9) |       |        |
| Q: 5                                    | 635 (15.6)  | 20.4 ( 1.6) |       |        |
| <b>% SS flu vaccine</b>                 |             |             | 1.2%  | <0.001 |
| Q: 1                                    | 868 (21.3)  | 21.3 ( 1.8) |       |        |
| Q: 2                                    | 828 (20.3)  | 20.9 ( 1.7) |       |        |
| Q: 3                                    | 734 (18.0)  | 21.0 ( 1.8) |       |        |
| Q: 4                                    | 612 (15.0)  | 20.8 ( 1.8) |       |        |
| Q: 5                                    | 339 ( 8.3)  | 20.3 ( 1.5) |       |        |
| <b>% SS pne vaccine</b>                 |             |             | 0.6%  | 0.011  |
| Q: 1                                    | 779 (19.1)  | 21.3 ( 1.8) |       |        |
| Q: 2                                    | 854 (21.0)  | 21.0 ( 1.7) |       |        |
| Q: 3                                    | 759 (18.6)  | 21.0 ( 1.8) |       |        |
| Q: 4                                    | 598 (14.7)  | 20.8 ( 1.7) |       |        |
| Q: 5                                    | 416 (10.2)  | 20.4 ( 1.5) |       |        |
